# Supplementary material for: Small airway lesions appear with the course of IPF and relate to the severity of pulmonary fibrosis progression
Source: Research Square preprint supplement (doi:10.21203/rs.3.rs-6653847/v1), 2025-06-17
Supplement: Supplementary file 1 [file 52c956f1ab70ef9e96f6e5ba.docx]

Attached table 1 CT fibrosis Scoring System for Idiopathic Pulmonary Fibrosis

| Score | Features |
| --- | --- |
| 0 | No fibrosis |
| 1 | Interlobular septal thickening; no discrete honeycombing |
| 2 | Honeycombing (with or without septal thickening) involving <25% of the lobe |
| 3 | Honeycombing (with or without septal thickening) involving 25-49% of the lobe |
| 4 | Honeycombing (with or without septal thickening) involving 50-75% of the lobe |
| 5 | Honeycombing (with or without septal thickening) involving >75% of the lobe |
